# Supplementary material for: A Survey of Public Opinion on Cat (Felis catus) Predation and the Future Direction of Cat Management in New Zealand
Source: Animals (Basel). 2017 Jul 3;7(7):49. doi: 10.3390/ani7070049 (PMC5532564; doi:10.3390/ani7070049)
Supplement: Supplementary file 1 [file animals-07-00049-s001.pdf]

Table S1: The influence of demographic variables on responses to questions regarding cat predation

| Question: Are you concerned about the predation of | Model Diagnostics                                   | Demographic                                 |                    | Question Response |                   |                   | Coefficient (Z)   | Odds Ratio(CI)    |
|----------------------------------------------------|-----------------------------------------------------|---------------------------------------------|--------------------|-------------------|-------------------|-------------------|-------------------|-------------------|
|                                                    |                                                     |                                             |                    | Yes               | No                | Don't Know        |                   |                   |
| <u>Non-native</u> wildlife by companion cats?      | 1. Log-Likelihood<br><i>p</i> Value = 0.02          | Ethnicity                                   | NZ European        | 179 (35%)         | 322 (62%)         | 14 (3%)           | -4.04             | 0.28 (0.15-0.52)  |
|                                                    |                                                     |                                             | NZ Maori           | 27 (39%)          | 38 (54%)          | 5 (7%)            |                   |                   |
|                                                    |                                                     |                                             | Asian/Indian       | 63 (51%)          | 52 (42%)          | 9 (7%)            |                   |                   |
|                                                    | 2. Pearson Chi-Squared = 0.56                       |                                             | European           | 72 (38%)          | 107 (57%)         | 9 (5%)            |                   |                   |
|                                                    |                                                     |                                             | Pacific/Cook Is.   | 10 (40%)          | 13 (52%)          | 2 (8%)            |                   |                   |
|                                                    |                                                     |                                             | Other              | 30 (38%)          | 44 (56%)          | 5 (6%)            |                   |                   |
|                                                    | 3. Deviance Chi-squared = 1.00                      | Age (median)                                | 46-55years         | 26-35years        | 26-35years        | -4.34             | 0.71 (0.61-0.83)  |                   |
| <u>Non-native</u> wildlife by colony cats?         | 1. Log-Likelihood<br><i>p</i> Value = <0.0001       | Ethnicity                                   | NZ European        | 270 (52%)         | 230 (45%)         | 15 (3%)           | -3.29             | 0.34 (0.18-0.65)  |
|                                                    |                                                     |                                             | NZ Maori           | 36 (52%)          | 31 (44%)          | 3 (4%)            |                   |                   |
|                                                    |                                                     |                                             | Asian/Indian       | 79 (65%)          | 36 (29%)          | 7 (6%)            |                   |                   |
|                                                    | 2. Pearson Chi-Squared = 1.00                       |                                             | European           | 98 (52%)          | 84 (45%)          | 6 (3%)            |                   |                   |
|                                                    |                                                     |                                             | Pacific/Cook Is.   | 11 (44%)          | 12 (48%)          | 2 (8%)            |                   |                   |
|                                                    |                                                     |                                             | Other              | 45 (57%)          | 30 (38%)          | 4 (5%)            |                   |                   |
|                                                    | 3. Deviance Chi-squared = 1.00                      | Age (median)                                | 36-45years         | 26-35years        | 26-35years        | -3.55             | 0.76 (0.65-0.88)  |                   |
|                                                    |                                                     | Marital Status                              | Single             | 236 (52%)         | 200 (44%)         | 21 (4%)           | 2.91              | 8.29 (2.00-34.40) |
|                                                    |                                                     |                                             | Married            | 185 (57%)         | 130 (40%)         | 12 (4%)           |                   |                   |
|                                                    | Divorced                                            |                                             | 39 (75%)           | 12 (23%)          | 1 (2%)            |                   |                   |                   |
|                                                    | De facto                                            |                                             | 63 (45%)           | 73 (52%)          | 4 (3%)            |                   |                   |                   |
|                                                    | Widowed                                             |                                             | 22 (67%)           | 9 (27%)           | 2 (6%)            |                   |                   |                   |
|                                                    | Income                                              |                                             | Less than \$50,000 | 132 (48%)         | 134 (48%)         | 11 (4%)           |                   |                   |
|                                                    | \$50,000-\$100,000                                  | 143 (54%)                                   | 112 (43%)          | 7 (3%)            |                   |                   |                   |                   |
|                                                    | \$100,000+                                          | 67 (57%)                                    | 48 (41%)           | 2 (2%)            |                   |                   |                   |                   |
|                                                    | No answer                                           | 24 (46%)                                    | 24 (46%)           | 4 (8%)            | 2.33              | 7.27 (1.37-38.62) |                   |                   |
|                                                    | <u>Non-native</u> wildlife by unmanaged stray cats? | 1. Log-Likelihood<br><i>p</i> Value = 0.014 | Age (median)       | 36-45years        | 26-35years        | 26-35years        | -3.28             | 0.77 (0.66-0.90)  |
| Ethnicity                                          |                                                     |                                             | NZ European        | 292 (57%)         | 217 (42%)         | 6 (1%)            | -2.85             | 0.39 (0.21-0.75)  |
|                                                    |                                                     |                                             | NZ Maori           | 41 (59%)          | 27 (38%)          | 2 (3%)            |                   |                   |
|                                                    |                                                     | Asian/Indian                                | 87 (70%)           | 32 (26%)          | 5 (4%)            |                   |                   |                   |
|                                                    |                                                     | European                                    | 106 (69%)          | 40 (26%)          | 7 (5%)            |                   |                   |                   |
|                                                    |                                                     | Pacific/Cook Is.                            | 18 (72%)           | 6 (24%)           | 1 (4%)            |                   |                   |                   |
|                                                    |                                                     | Other                                       | 49 (62%)           | 27 (34%)          | 3 (4%)            |                   |                   |                   |
| Marital Status                                     |                                                     | Single                                      | 261 (57%)          | 186 (41%)         | 10 (2%)           | 1.96              | 5.58 (1.00-34.22) |                   |
|                                                    |                                                     | Married                                     | 199 (61%)          | 120 (37%)         | 8 (2%)            |                   |                   |                   |
|                                                    |                                                     | Divorced                                    | 40 (77%)           | 9 (17%)           | 3 (6%)            |                   |                   |                   |
|                                                    |                                                     | De facto                                    | 73 (52%)           | 64 (46%)          | 3 (2%)            |                   |                   |                   |
|                                                    |                                                     | Widowed                                     | 26 (79%)           | 6 (18%)           | 1 (3%)            |                   |                   |                   |
|                                                    |                                                     | Residential Location                        | Urban              | 196 (59%)         | 128 (39%)         |                   |                   | 8 (2%)            |
| Suburban                                           |                                                     | 251 (59%)                                   | 165 (39%)          | 11 (2%)           |                   |                   |                   |                   |
| Rural                                              | 89 (61%)                                            | 52 (36%)                                    | 4 (3%)             | 1.98              | 6.64 (1.02-43.21) |                   |                   |                   |
| <u>Non-native</u> wildlife by feral cats?          | 1. Log-Likelihood<br><i>p</i> Value = 0.006         | Age (median)                                | 36-45years         | 26-35years        | 36-45years        | -3.10             | 0.78 (0.67-0.91)  |                   |
|                                                    |                                                     | Ethnicity                                   | NZ European        | 303 (59%)         | 192 (37%)         | 20 (4%)           | -2.56             | 0.43 (0.23-0.82)  |
|                                                    | NZ Maori                                            |                                             | 46 (66%)           | 22 (31%)          | 2 (3%)            |                   |                   |                   |
|                                                    | Asian/Indian                                        |                                             | 74 (60%)           | 42 (34%)          | 8 (6%)            |                   |                   |                   |
|                                                    | European                                            |                                             | 118 (63%)          | 65 (35%)          | 5 (2%)            |                   |                   |                   |
|                                                    | Pacific/Cook Is.                                    |                                             | 17 (68%)           | 7 (28%)           | 1 (4%)            |                   |                   |                   |
|                                                    | Other                                               |                                             | 43 (54%)           | 30 (38%)          | 6 (8%)            |                   |                   |                   |
|                                                    | Education                                           | Primary (or less)                           | 12 (63%)           | 5 (26%)           | 2 (11%)           |                   |                   |                   |

|                                           |                                             |                    |                                                 |                                             |             |                   |            |                   |                  |                  |
|-------------------------------------------|---------------------------------------------|--------------------|-------------------------------------------------|---------------------------------------------|-------------|-------------------|------------|-------------------|------------------|------------------|
|                                           |                                             |                    | Secondary                                       | 133 (59%)                                   | 85 (38%)    | 6 (3%)            | -2.0       | 0.05 (0.00-0.95)  |                  |                  |
|                                           |                                             |                    | Certificate/Diploma                             | 145 (63%)                                   | 75 (33%)    | 10 (4%)           |            |                   |                  |                  |
|                                           |                                             |                    | Undergraduate                                   | 168 (57%)                                   | 112 (38%)   | 16 (5%)           |            |                   |                  |                  |
|                                           |                                             |                    | Postgraduate                                    | 143 (63%)                                   | 78 (34%)    | 8 (3%)            | -2.07      | 0.05 (0.00-0.85)  |                  |                  |
| <u>Native wildlife</u> by companion cats? | 1. Log-Likelihood<br><i>p</i> Value = 0.003 | Gender             | Male                                            | 357 (72%)                                   | 132 (26%)   | 8 (2%)            |            |                   |                  |                  |
|                                           |                                             |                    | Female                                          | 327 (66%)                                   | 150 (30%)   | 17 (4%)           | 2.07       | 3.81 (1.08 -3.49) |                  |                  |
|                                           | 2. Pearson Chi-Squared = 1.00               | Age (median)       |                                                 | 36-45years                                  | 26-35years  | 36-45years        | -4.39      | 0.67 (0.55-0.80)  |                  |                  |
|                                           |                                             |                    |                                                 |                                             |             |                   |            |                   |                  |                  |
|                                           | 3. Deviance Chi-squared = 1.00              |                    |                                                 |                                             |             |                   |            |                   |                  |                  |
|                                           |                                             |                    |                                                 |                                             |             |                   |            |                   |                  |                  |
| <u>Native wildlife</u> by colony cats?    | 1. Log-Likelihood<br><i>p</i> Value = 0.003 | Ethnicity          | NZ European                                     | 437 (85%)                                   | 66 (13%)    | 12 (2%)           |            |                   |                  |                  |
|                                           |                                             |                    | NZ Maori                                        | 55 (79%)                                    | 14 (20%)    | 1 (1%)            |            |                   |                  |                  |
|                                           |                                             |                    | Asian/Indian                                    | 95 (77%)                                    | 23 (18%)    | 6 (5%)            |            |                   |                  |                  |
|                                           |                                             |                    | European                                        | 147 (78%)                                   | 34 (18%)    | 7 (4%)            |            |                   |                  |                  |
|                                           | 2. Pearson Chi-Squared = 1.00               |                    | Pacific/Cook Is.                                | 21 (84%)                                    | 4 (16%)     | 0 (0%)            |            |                   |                  |                  |
|                                           |                                             |                    | Other                                           | 61 (77%)                                    | 17 (22%)    | 1 (1%)            | 2.16       | 2.55 (1.09-5.94)  |                  |                  |
|                                           |                                             |                    | 3. Deviance Chi-squared = 1.00                  | Age                                         |             | 36-45years        | 26-35years | 26-35years        | -2.89            | 0.71 (0.57-0.90) |
|                                           |                                             |                    |                                                 |                                             | Education   | Primary (or less) | 12 (63%)   | 6 (32%)           | 1 (5%)           |                  |
|                                           | Secondary                                   | 174 (78%)          |                                                 |                                             |             | 44 (19%)          | 6 (3%)     |                   |                  |                  |
|                                           | Certificate/Diploma                         | 192 (84%)          |                                                 |                                             |             | 33 (14%)          | 5 (2%)     | -2.07             | 0.14 (0.02-0.90) |                  |
|                                           |                                             |                    | Undergraduate                                   | 237 (80%)                                   |             | 45 (15%)          | 14 (5%)    | -2.32             | 0.11 (0.02-0.71) |                  |
|                                           |                                             |                    | Postgraduate                                    | 200 (87%)                                   | 27 (12%)    | 2 (1%)            | -2.40      | 0.10 (0.01-0.65)  |                  |                  |
|                                           |                                             |                    | Income                                          | Less than \$50,000                          | 216 (78%)   | 54 (19%)          | 7 (3%)     |                   |                  |                  |
|                                           |                                             |                    |                                                 | \$50,000-\$100,000                          | 227 (87%)   | 31 (12%)          | 4 (1%)     |                   |                  |                  |
|                                           |                                             |                    |                                                 | \$100,000+                                  | 96 (82%)    | 19 (16%)          | 2 (2%)     |                   |                  |                  |
|                                           |                                             |                    | No answer                                       | 43 (83%)                                    | 5 (9%)      | 4 (8%)            | 2.45       | 9.24 (1.56-54.57) |                  |                  |
|                                           |                                             |                    | <u>Native wildlife</u> by unmanaged stray cats? | 1. Log-Likelihood<br><i>p</i> Value = 0.001 | Age (median |                   | 36-45years | 26-35years        | 26-35years       | -3.41            |
| Income                                    | Less than \$50,000                          | 233 (84%)          |                                                 |                                             | 37 (13%)    | 7 (3%)            |            |                   |                  |                  |
| 2. Pearson Chi-Squared = 1.00             |                                             | \$50,000-\$100,000 |                                                 | 239 (91%)                                   | 23 (9%)     | 0 (0%)            |            |                   |                  |                  |
|                                           |                                             | \$100,000+         |                                                 | 101 (86%)                                   | 14 (12%)    | 2 (2%)            | 2.40       | 3.09 (1.23-7.73)  |                  |                  |
|                                           |                                             | No answer          |                                                 | 46 (88%)                                    | 3 (6%)      | 3 (6%)            |            |                   |                  |                  |
| 3. Deviance Chi-squared = 1.00            |                                             |                    |                                                 |                                             |             |                   |            |                   |                  |                  |

Table S2: The influence of demographic variables on responses to questions surrounding responsible companion cat ownership

| Question                                                                       |                                                | Demographic                           |                   | Question Response |            |            | Coefficient (Z)  | Odds Ratio(CI)   |                  |
|--------------------------------------------------------------------------------|------------------------------------------------|---------------------------------------|-------------------|-------------------|------------|------------|------------------|------------------|------------------|
|                                                                                |                                                |                                       |                   | Yes               | No         | Don't Know |                  |                  |                  |
| Should it be compulsory for companion cats to be desexed?                      | 1. Log-Likelihood<br><i>p</i> Value = < 0.0001 | Gender                                | Male              | 248 (50%)         | 212 (43%)  | 37 (7%)    | -2.16            | 0.66 (0.45-1.96) |                  |
|                                                                                | Female                                         |                                       | 323 (65%)         | 144 (29%)         | 27 (6%)    |            |                  |                  |                  |
|                                                                                | 2. Pearson Chi-Squared = 0.93                  |                                       |                   |                   |            |            |                  |                  |                  |
|                                                                                | 3. Deviance Chi-squared = 1.00                 |                                       |                   |                   |            |            |                  |                  |                  |
|                                                                                |                                                | Age (median)                          |                   | 46-55years        | 26-35years | 36-45years | -4.47            | 0.68 (0.58-0.81) |                  |
| Should it be compulsory for companion cats to be microchipped?                 | 1. Log-Likelihood<br><i>p</i> Value = 0.05     | Residential Location                  | Urban             | 223 (67%)         | 91 (27%)   | 18 (6%)    | 2.37             | 2.95 (1.21-7.20) |                  |
|                                                                                |                                                |                                       | Suburban          | 279 (65%)         | 113 (27%)  | 35 (8%)    |                  |                  |                  |
|                                                                                |                                                |                                       | Rural             | 94 (65%)          | 48 (33%)   | 3 (2%)     |                  |                  |                  |
|                                                                                | 2. Pearson Chi-Squared = 0.92                  | Age (median)                          | 36-45years        | 26-35years        | 46-55years | 2.35       | 1.43 (1.06-1.92) |                  |                  |
|                                                                                |                                                |                                       | Marital Status    | Single            | 284 (62%)  |            |                  | 145 (32%)        | 28 (6%)          |
|                                                                                |                                                |                                       | Married           | 225 (69%)         | 83 (25%)   |            |                  | 19 (6%)          |                  |
|                                                                                | 3. Deviance Chi-squared = 1.00                 |                                       | Divorced          | 37 (71%)          | 14 (27%)   | 1 (2%)     | -2.25            | 0.54 (0.32-0.92) |                  |
|                                                                                |                                                |                                       | De facto          | 95 (68%)          | 37 (26%)   | 8 (6%)     |                  |                  |                  |
|                                                                                |                                                |                                       | Widowed           | 25 (76%)          | 5 (15%)    | 3 (9%)     |                  |                  |                  |
|                                                                                |                                                |                                       |                   |                   |            |            |                  |                  |                  |
| Should it be compulsory for companion cats to be registered with the council?  | 1. Log-Likelihood<br><i>p</i> Value = <0.0001  | Ethnicity                             | NZ European       | 282 (55%)         | 208 (40%)  | 25 (5%)    | -3.14            | 0.18 (0.06-0.52) |                  |
|                                                                                |                                                |                                       | NZ Maori          | 38 (54%)          | 28 (40%)   | 4 (6%)     |                  |                  |                  |
|                                                                                |                                                |                                       | Asian/Indian      | 108 (87%)         | 14 (11%)   | 2 (2%)     |                  |                  |                  |
|                                                                                |                                                |                                       | European          | 106 (57%)         | 72 (38%)   | 10 (5%)    |                  |                  |                  |
|                                                                                |                                                |                                       | Pacific/Cook Is.  | 16 (70%)          | 6 (26%)    | 1 (4%)     |                  |                  |                  |
|                                                                                | 2. Pearson Chi-Squared = 0.05                  | Other                                 |                   | 59 (75%)          | 19 (24%)   | 1 (1%)     |                  |                  |                  |
|                                                                                |                                                |                                       |                   |                   |            |            |                  |                  |                  |
|                                                                                | 3. Deviance Chi-squared =1.00                  | Cat Owner                             | Yes               | 153 (47%)         | 162 (50%)  | 11 (3%)    | -3.89            | 0.46 (0.31-0.68) |                  |
|                                                                                |                                                |                                       | No                | 463 (68%)         | 186 (27%)  | 35 (5%)    |                  |                  |                  |
|                                                                                |                                                | Age (median)                          | 36-45years        | 46-55years        | 26-35years | 4.53       | 1.45 (1.24-1.71) |                  |                  |
| Should there be a limit to the number of cats one household can own at a time? | 1. Log-Likelihood<br><i>p</i> Value = 0.002    | Ethnicity                             | NZ European       | 392 (76%)         | 99 (19%)   | 24 (5%)    | 2.22             | 1.79 (1.07-3.00) |                  |
|                                                                                |                                                |                                       | NZ Maori          | 46 (66%)          | 21 (30%)   | 3 (4%)     |                  |                  |                  |
|                                                                                |                                                |                                       | Asian/Indian      | 73 (59%)          | 47 (38%)   | 4 (3%)     |                  |                  |                  |
|                                                                                |                                                |                                       | European          | 124 (66%)         | 54 (29%)   | 9 (5%)     |                  |                  |                  |
|                                                                                |                                                |                                       | Pacific/Cook Is.  | 13 (52%)          | 11 (44%)   | 1 (4%)     |                  |                  |                  |
|                                                                                | 2. Pearson Chi-Squared = 0.09                  | Other                                 |                   | 52 (66%)          | 24 (30%)   | 3 (4%)     | -1.99            | 0.83 (0.69-1.00) |                  |
|                                                                                |                                                |                                       |                   |                   |            |            |                  |                  |                  |
|                                                                                |                                                |                                       |                   |                   |            |            |                  |                  |                  |
|                                                                                | 3. Deviance Chi-squared = 1.00                 | Age (median)                          | 36-45years        | 26-35years        | 26-35years | -1.99      | 0.83 (0.69-1.00) |                  |                  |
|                                                                                |                                                |                                       | Marital Status    | Single            | 267 (58%)  |            |                  | 168 (37%)        | 21 (5%)          |
|                                                                                |                                                | Married                               | 261 (80%)         | 52 (16%)          | 14 (4%)    | -2.61      | 0.47 (0.27-0.83) |                  |                  |
|                                                                                |                                                | Divorced                              | 42 (81%)          | 8 (15%)           | 2 (4%)     |            |                  |                  |                  |
|                                                                                |                                                | De facto                              | 102 (73%)         | 31 (22%)          | 7 (5%)     | -2.17      | 0.06 (0.00-0.76) |                  |                  |
|                                                                                |                                                | Widowed                               | 32 (97%)          | 1 (3%)            | 0 (0%)     |            |                  |                  |                  |
|                                                                                |                                                | Education                             | Primary (or less) | 12 (63%)          | 5 (26%)    |            |                  | 2 (11%)          |                  |
|                                                                                |                                                |                                       | Secondary         | 150 (67%)         | 62 (28%)   |            |                  | 12 (5%)          |                  |
| Certificate/Diploma                                                            |                                                |                                       | 166 (72%)         | 56 (24%)          | 8 (4%)     |            |                  |                  |                  |
| Undergraduate                                                                  |                                                |                                       | 200 (68%)         | 83 (28%)          | 13 (4%)    |            |                  |                  |                  |
| Postgraduate                                                                   |                                                | 167 (73%)                             | 52 (23%)          | 9 (4%)            |            |            |                  |                  |                  |
| Should there be times when cats must be confined to the owners                 |                                                | 1. Log-Likelihood<br><i>p</i> Value = | Cat Owner         | Yes               | 101 (31%)  | 202 (62%)  | 23 (7%)          | -2.64            | 0.59 (0.40-0.87) |
|                                                                                |                                                |                                       |                   | No                | 316 (46%)  | 308 (45%)  | 59 (9%)          |                  |                  |
|                                                                                | Ethnicity                                      | NZ European                           | 181 (35%)         | 291 (57%)         | 42 (8%)    |            |                  |                  |                  |

|                                                                             |                                |              |                    |            |            |          |       |                  |
|-----------------------------------------------------------------------------|--------------------------------|--------------|--------------------|------------|------------|----------|-------|------------------|
| property                                                                    | <0.0001                        |              | NZ Maori           | 31 (44%)   | 36 (52%)   | 3 (4%)   | -2.06 | 0.48 (0.24-0.96) |
|                                                                             |                                |              | Asian/Indian       | 70 (56%)   | 38 (31%)   | 16 (13%) | -4.82 | 0.20 (0.10-0.38) |
|                                                                             | 2. Pearson Chi-Squared = 0.13  |              | European           | 76 (59%)   | 38 (29%)   | 16 (12%) |       |                  |
|                                                                             |                                |              | Pacific/Cook Is.   | 16 (64%)   | 8 (32%)    | 1 (4%)   | -2.20 | 0.26 (0.08-0.86) |
|                                                                             | 3. Deviance Chi-squared = 0.99 |              | Other              | 37 (47%)   | 38 (48%)   | 4 (5%)   |       |                  |
| Should there be times when cats must be confined inside their owner's home? | 1. Log-Likelihood              | Ethnicity    | NZ European        | 171 (33%)  | 319 (62%)  | 24 (5%)  |       |                  |
|                                                                             |                                |              | NZ Maori           | 26 (37%)   | 42 (60%)   | 2 (3%)   |       |                  |
|                                                                             |                                |              | Asian/Indian       | 61 (49%)   | 56 (45%)   | 7 (6%)   | -4.06 | 0.27 (0.14-0.51) |
|                                                                             |                                |              | European           | 63 (34%)   | 107 (57%)  | 17 (9%)  |       |                  |
|                                                                             |                                |              | Pacific/Cook Is.   | 14 (56%)   | 10 (40%)   | 1 (4%)   | -2.90 | 0.17 (0.05-0.56) |
|                                                                             | 2. Pearson Chi-Squared = 0.23  |              | Other              | 28 (35%)   | 42 (53%)   | 9 (11%)  |       |                  |
|                                                                             |                                | Age (median) | 36-45years         | 26-35years | 36-45years |          | -4.20 | 0.71 (0.60-0.83) |
|                                                                             | 3. Deviance Chi-squared = 1.00 | Income       | Less than \$50,000 | 90 (32%)   | 169 (61%)  | 18 (7%)  |       |                  |
|                                                                             |                                |              | \$50,000-\$100,000 | 88 (34%)   | 156 (59%)  | 18 (7%)  |       |                  |
|                                                                             |                                |              | \$100,000+         | 29 (25%)   | 83 (71%)   | 5 (4%)   | 2.35  | 2.09 (1.13-3.87) |
| Should there be areas in which companion cats are not allowed to be owned?  |                                |              | No answer          | 21 (40%)   | 27 (52%)   | 1 (8%)   |       |                  |
|                                                                             | 1. Log-Likelihood              | Cat Owner    | Yes                | 189 (58%)  | 109 (33%)  | 28 (9%)  |       |                  |
|                                                                             |                                |              | No                 | 482 (71%)  | 165 (24%)  | 37 (5%)  | -4.68 | 0.37 (0.24-0.56) |
|                                                                             |                                | Ethnicity    | NZ European        | 350 (68%)  | 130 (25%)  | 35 (7%)  |       |                  |
|                                                                             |                                |              | NZ Maori           | 44 (63%)   | 19 (27%)   | 7 (10%)  |       |                  |
|                                                                             |                                |              | Asian/Indian       | 80 (64%)   | 37 (30%)   | 7 (6%)   | 2.31  | 2.22 (1.13-4.36) |
|                                                                             |                                |              | European           | 122 (65%)  | 55 (29%)   | 11 (6%)  | 2.09  | 1.17 (1.03-2.82) |
|                                                                             |                                |              | Pacific/Cook Is.   | 15 (60%)   | 8 (32%)    | 2 (8%)   |       |                  |
|                                                                             |                                |              | Other              | 51 (64%)   | 25 (32%)   | 3 (4%)   |       |                  |
|                                                                             | 2. Pearson Chi-Squared = 0.17  |              | Less than \$50,000 | 185 (67%)  | 63 (23%)   | 29 (10%) |       |                  |
|                                                                             |                                | Income       | \$50,000-\$100,000 | 188 (72%)  | 63 (24%)   | 11 (4%)  | -2.66 | 0.33 (0.15-0.75) |
|                                                                             |                                |              | \$100,000+         | 76 (65%)   | 36 (31%)   | 5 (4%)   | -2.14 | 0.27 (0.08-0.90) |
|                                                                             |                                |              | No answer          | 29 (56%)   | 17 (33%)   | 6 (11%)  |       |                  |
|                                                                             | 3. Deviance Chi-squared = 1.00 |              |                    |            |            |          |       |                  |

Table S3: The influence of demographic variables on responses to questions regarding the management of cat populations

| Question:                                                                                                                      |                                                                                                                                  |                    | Question Response |                      |                                 |                          |            | Coefficient (Z)                          | Odds Ratio(CI)                       |
|--------------------------------------------------------------------------------------------------------------------------------|----------------------------------------------------------------------------------------------------------------------------------|--------------------|-------------------|----------------------|---------------------------------|--------------------------|------------|------------------------------------------|--------------------------------------|
| Who should be responsible for controlling colony cats?                                                                         | Cat Owner                                                                                                                        | Yes                | Government        | Council <sup>2</sup> | SPCA <sup>3</sup>               | Combination <sup>4</sup> | Other      | 1.98                                     | 2.54 (1.01-6.37)                     |
|                                                                                                                                |                                                                                                                                  | No                 | 31 (12%)          | 91 (35%)             | 24 (9%)                         | 85 (33%)                 | 29 (11%)   |                                          |                                      |
|                                                                                                                                | Ethnicity                                                                                                                        | NZ European        | 73 (13%)          | 187 (33%)            | 63 (11%)                        | 188 (33%)                | 53 (10%)   | -2.29                                    | 0.27 (0.09-0.83)                     |
|                                                                                                                                |                                                                                                                                  | NZ Maori           | 46 (11%)          | 171 (39%)            | 40 (9%)                         | 133 (31%)                | 45 (10%)   |                                          |                                      |
|                                                                                                                                |                                                                                                                                  | Asian/Indian       | 7 (12.5%)         | 14 (25%)             | 8 (14%)                         | 20 (36%)                 | 7 (12.5%)  |                                          |                                      |
|                                                                                                                                |                                                                                                                                  | European           | 18 (18%)          | 29 (29%)             | 12 (12%)                        | 34 (34%)                 | 6 (6%)     |                                          |                                      |
|                                                                                                                                | Residential Location                                                                                                             | Pacific/Cook Is.   | 20 (13%)          | 52 (35%)             | 16 (11%)                        | 48 (32%)                 | 14 (9%)    | -2.14                                    | 0.40 (0.18-0.93)                     |
|                                                                                                                                |                                                                                                                                  | Other              | 3 (17%)           | 2 (11%)              | 2 (11%)                         | 9 (50%)                  | 2 (11%)    |                                          |                                      |
|                                                                                                                                |                                                                                                                                  | Urban              | 10 (17%)          | 9 (15%)              | 7 (12%)                         | 25 (42%)                 | 8 (14%)    |                                          |                                      |
|                                                                                                                                |                                                                                                                                  | Suburban           | 43 (16%)          | 79 (30%)             | 25 (10%)                        | 87 (33%)                 | 28 (11%)   |                                          |                                      |
| Model Diagnostics<br>1. Log-Likelihood<br>$p$ Value = 0.004<br>2. Pearson Chi-Squared = 0.64<br>3. Deviance Chi-squared = 1.00 | Income                                                                                                                           | Rural              | 33 (9%)           | 124 (35%)            | 42 (12%)                        | 125 (35%)                | 30 (9%)    | <sup>2</sup> 2.06                        | 2.13 (1.04-4.36)                     |
|                                                                                                                                |                                                                                                                                  | Less than \$50,000 | 13 (11%)          | 38 (32%)             | 11 (9%)                         | 40 (33%)                 | 18 (15%)   | <sup>3</sup> 2.52                        | 3.57 (1.33-9.57)                     |
|                                                                                                                                | Income                                                                                                                           | \$50,000-\$100,000 | 26 (12%)          | 59 (27%)             | 32 (15%)                        | 84 (38%)                 | 17 (8%)    | <sup>4</sup> 2.50                        | 2.43 (1.21-4.89)                     |
|                                                                                                                                |                                                                                                                                  | \$100,000+         | 21 (9%)           | 80 (36%)             | 16 (7%)                         | 87 (39%)                 | 21 (9%)    | -2.14                                    | 0.32 (0.11-0.89)                     |
|                                                                                                                                |                                                                                                                                  | No answer          | 13 (13%)          | 36 (37%)             | 6 (6%)                          | 30 (31%)                 | 13 (13%)   | -2.29                                    | 0.19 (0.05-0.79)                     |
|                                                                                                                                |                                                                                                                                  |                    | 7 (16%)           | 14 (33%)             | 2 (5%)                          | 16 (37%)                 | 4 (9%)     |                                          |                                      |
|                                                                                                                                | What action should be taken towards controlling colony cats?                                                                     | Cat Owner          | Lethal Action     | TNR <sup>2</sup>     | Non Killing Method <sup>3</sup> | Other                    | Don't Know | <sup>3</sup> -2.24<br><sup>2</sup> -2.15 | 0.46 (0.23-0.91)<br>0.53 (0.29-0.95) |
|                                                                                                                                |                                                                                                                                  |                    | 54 (20%)          | 101 (38%)            | 55 (21%)                        | 51 (19%)                 | 4 (2%)     |                                          |                                      |
|                                                                                                                                | Model Diagnostics<br>1. Log-Likelihood<br>$p$ Value = <0.0001<br>2. Pearson Chi-Squared = 0.13<br>3. Deviance Chi-squared = 1.00 | No                 | 140 (25%)         | 214 (37%)            | 82 (14%)                        | 112 (20%)                | 24 (4%)    | 2.22                                     | 2.11 (1.09-4.09)                     |
|                                                                                                                                |                                                                                                                                  | Gender             | 101 (25%)         | 139 (35%)            | 58 (15%)                        | 90 (22%)                 | 13 (3%)    |                                          |                                      |
|                                                                                                                                |                                                                                                                                  | Male               | 90 (22%)          | 172 (41%)            | 74 (18%)                        | 68 (16%)                 | 14 (3%)    |                                          |                                      |
|                                                                                                                                |                                                                                                                                  | Female             | 56-65years        | 26-35years           | 36-45years                      | 26-35years               | 26-35years | -3.72                                    | 0.61 (0.47-0.79)                     |
| Should action be taken towards controlling unmanaged stray cats?                                                               | Age (median)                                                                                                                     | Less than \$50,000 | 26 (12%)          | 104 (48%)            | 35 (16%)                        | 49 (22%)                 | 5 (2%)     | -2.73                                    | 0.39 (0.20-0.77)                     |
|                                                                                                                                |                                                                                                                                  | \$50,000-\$100,000 | 60 (26%)          | 80 (35%)             | 34 (15%)                        | 49 (21%)                 | 6 (3%)     |                                          |                                      |
|                                                                                                                                | Income                                                                                                                           | \$100,000+         | 34 (35%)          | 24 (25%)             | 20 (21%)                        | 18 (18%)                 | 1 (1%)     | -2.73                                    | 0.30 (0.12-0.71)                     |
|                                                                                                                                |                                                                                                                                  | No answer          | 12 (27%)          | 17 (39%)             | 9 (21%)                         | 5 (11%)                  | 1 (2%)     |                                          |                                      |
|                                                                                                                                |                                                                                                                                  |                    |                   |                      |                                 |                          |            |                                          |                                      |
|                                                                                                                                |                                                                                                                                  |                    |                   |                      |                                 |                          |            |                                          |                                      |
|                                                                                                                                | Residential Location                                                                                                             | Urban              | 57 (21%)          | 102 (38%)            | 39 (15%)                        | 59 (22%)                 | 11 (4%)    | -3.20                                    | 0.27 (0.12-0.61)                     |
|                                                                                                                                |                                                                                                                                  | Suburban           | 71 (20%)          | 147 (41%)            | 64 (18%)                        | 64 (18%)                 | 10 (3%)    |                                          |                                      |
|                                                                                                                                | Age (median)                                                                                                                     | Rural              | 46 (38%)          | 35 (29%)             | 20 (16.5%)                      | 20 (16.5%)               | 0 (0%)     | -2.46                                    | 0.64 (0.45-0.91)                     |
|                                                                                                                                |                                                                                                                                  | Yes                | 36-45years        | 26-35years           | 26-35years                      | 26-35years               | 26-35years |                                          |                                      |
| Model Diagnostics<br>1. Log-Likelihood<br>$p$ Value =<br>2. Pearson Chi-Squared =<br>3. Deviance Chi-squared =                 | Ethnicity                                                                                                                        | NZ European        | 487 (93%)         | 24 (5%)              | 13 (2%)                         | 4 (6%)                   | 7 (6%)     | 2.85                                     | 4.88 (1.64-14.54)                    |
|                                                                                                                                |                                                                                                                                  | NZ Maori           | 63 (90%)          | 3 (4%)               | 4 (6%)                          | 7 (6%)                   | 5 (3%)     |                                          |                                      |
|                                                                                                                                | Income                                                                                                                           | Asian/Indian       | 104 (84%)         | 13 (10%)             | 5 (3%)                          | 2 (8%)                   | 2 (8%)     | 3.21                                     | 6.80 (2.11-21.96)                    |
|                                                                                                                                |                                                                                                                                  | European           | 165 (88%)         | 18 (9%)              | 1 (1%)                          | 12 (4%)                  | 4 (1%)     |                                          |                                      |
|                                                                                                                                |                                                                                                                                  | Pacific/Cook Is.   | 21 (84%)          | 2 (8%)               | 1 (1%)                          | 1 (1%)                   | 2 (4%)     |                                          |                                      |
|                                                                                                                                |                                                                                                                                  | Other              | 65 (82%)          | 13 (17%)             | 1 (1%)                          | 1 (1%)                   | 2 (4%)     |                                          |                                      |
|                                                                                                                                | Who should be responsible for controlling unmanaged stray cats?                                                                  | Less than \$50,000 | 248 (90%)         | 17 (6%)              | 1 (1%)                          | 1 (1%)                   | 2 (4%)     | -2.34                                    | 0.38 (0.17-0.85)                     |
|                                                                                                                                |                                                                                                                                  | \$50,000-\$100,000 | 243 (93%)         | 15 (6%)              | 1 (1%)                          | 1 (1%)                   | 2 (4%)     |                                          |                                      |
|                                                                                                                                |                                                                                                                                  | \$100,000+         | 103 (88%)         | 13 (11%)             | 1 (1%)                          | 1 (1%)                   | 2 (4%)     |                                          |                                      |
|                                                                                                                                |                                                                                                                                  | No answer          | 49 (94%)          | 1 (2%)               | 1 (2%)                          | 1 (2%)                   | 2 (4%)     |                                          |                                      |
| Model Diagnostics                                                                                                              | Gender                                                                                                                           | Male               | Government        | Council              | SPCA                            | Combination              | Other      | -2.65                                    | 0.14 (0.02-0.78)                     |
|                                                                                                                                |                                                                                                                                  | Female             | 57 (13%)          | 134 (32%)            | 46 (11%)                        | 136 (32%)                | 50 (12%)   |                                          |                                      |
|                                                                                                                                | Ethnicity                                                                                                                        | NZ European        | 62 (14%)          | 130 (29%)            | 48 (11%)                        | 165 (37%)                | 39 (9%)    | -2.65                                    | 0.14 (0.02-0.78)                     |
|                                                                                                                                |                                                                                                                                  | NZ Maori           | 54 (12%)          | 161 (34%)            | 43 (9%)                         | 159 (34%)                | 53 (11%)   |                                          |                                      |
|                                                                                                                                |                                                                                                                                  | Asian/Indian       | 8 (13%)           | 15 (25%)             | 13 (22%)                        | 17 (28%)                 | 7 (12%)    |                                          |                                      |

|                                                                                |                         |                    |               |                  |                                    |                    |                         |                    |                   |  |
|--------------------------------------------------------------------------------|-------------------------|--------------------|---------------|------------------|------------------------------------|--------------------|-------------------------|--------------------|-------------------|--|
| 1. Log-Likelihood<br>p Value = 0.004                                           |                         | European           | 23 (14%)      | 54 (34%)         | 17 (11%)                           | 53 (33%)           | 13 (8%)                 |                    |                   |  |
|                                                                                |                         | Pacific/Cook Is.   | 2 (9.5%)      | 5 (24%)          | 2 (9.5%)                           | 11 (52%)           | 1 (5%)                  |                    |                   |  |
|                                                                                |                         | Other              | 10 (15%)      | 7 (11%)          | 9 (14%)                            | 31 (48%)           | 8 (12%)                 |                    |                   |  |
| 2. Pearson Chi<br>-Squared = 1.00                                              | Residential<br>Location | Urban              | 50 (18%)      | 79 (28%)         | 31 (11%)                           | 92 (32%)           | 32 (11%)                | 2.29               | 2.12 (1.11-4.04)  |  |
|                                                                                |                         | Suburban           | 41 (11%)      | 120 (32%)        | 46 (12%)                           | 141 (37%)          | 31 (8%)                 |                    |                   |  |
|                                                                                |                         | Rural              | 16 (13%)      | 35 (27%)         | 13 (10%)                           | 44 (34%)           | 20 (16%)                |                    |                   |  |
| 3. Deviance Chi-squared<br>= 1.00                                              | Income                  | Less than \$50,000 | 30 (12%)      | 60 (25%)         | 34 (14%)                           | 101 (41%)          | 13 (8%)                 | -2.68              | 0.14 (0.03-0.59)  |  |
|                                                                                |                         | \$50,000-\$100,000 | 24 (10%)      | 73 (31%)         | 24 (10%)                           | 92 (39%)           | 25 (10%)                |                    |                   |  |
|                                                                                |                         | \$100,000+         | 15 (15%)      | 39 (38%)         | 5 (5%)                             | 29 (28%)           | 14 (14%)                |                    |                   |  |
|                                                                                |                         | No answer          | 10 (21%)      | 14 (29%)         | 5 (10%)                            | 17 (36%)           | 2 (4%)                  |                    |                   |  |
| What action should be<br>taken towards<br>controlling unmanaged<br>stray cats? |                         |                    | Lethal Action | TNR <sup>2</sup> | Non Killing<br>Method <sup>3</sup> | Other <sup>4</sup> | Don't Know <sup>5</sup> |                    |                   |  |
|                                                                                | Gender                  | Male               | 130 (30%)     | 134 (31%)        | 50 (12%)                           | 101 (23%)          | 17 (4%)                 | 3.88               | 3.60 (1.88-6.87)  |  |
|                                                                                |                         | Female             | 129 (28%)     | 131 (29%)        | 84 (19%)                           | 90 (20%)           | 20 (4%)                 |                    |                   |  |
| Model Diagnostics<br>1. Log-Likelihood<br>p Value = < 0.0001                   | Age (median)            |                    | 56-65years    | 26-35years       | 26-35years                         | 36-45years         | 26-35years              | <sup>2</sup> -5.55 | 0.54 (0.44-0.67)  |  |
|                                                                                |                         |                    |               |                  |                                    |                    |                         | <sup>3</sup> -4.60 | 0.53 (0.41-0.70)  |  |
|                                                                                |                         |                    |               |                  |                                    |                    |                         | <sup>4</sup> -4.09 | 0.62 (0.49-0.78)  |  |
| 2. Pearson Chi<br>-Squared = 0.68                                              | Ethnicity               | NZ European        | 178 (37%)     | 135 (28%)        | 65 (14%)                           | 86 (18%)           | 14 (3%)                 | <sup>5</sup> -3.22 | 0.39 (0.22-0.69)  |  |
|                                                                                |                         | NZ Maori           | 15 (24%)      | 26 (41%)         | 9 (14%)                            | 9 (14%)            | 4 (7%)                  |                    |                   |  |
|                                                                                |                         | Asian/Indian       | 9 (9%)        | 39 (37%)         | 17 (16%)                           | 33 (32%)           | 6 (6%)                  |                    |                   |  |
| 3. Deviance Chi-squared<br>= 1.00                                              |                         | European           | 45 (27%)      | 45 (27%)         | 30 (18%)                           | 38 (23%)           | 7 (4%)                  | <sup>3</sup> 1.97  | 4.17 (1.01-17.26) |  |
|                                                                                |                         | Pacific/Cook Is.   | 2 (10%)       | 3 (14%)          | 4 (19%)                            | 9 (43%)            | 3 (14%)                 |                    |                   |  |
|                                                                                |                         | Other              | 14 (22%)      | 17 (26%)         | 13 (20%)                           | 17 (26%)           | 4 (6%)                  |                    |                   |  |
|                                                                                | Marital Status          | Single             | 62 (16%)      | 132 (34%)        | 77 (20%)                           | 89 (23%)           | 27 (7%)                 | <sup>4</sup> 2.40  | 5.14 (1.35-19.60) |  |
|                                                                                |                         | Married            | 121 (39%)     | 82 (27%)         | 36 (12%)                           | 64 (21%)           | 5 (5%)                  |                    |                   |  |
|                                                                                |                         | Divorced           | 23 (49%)      | 10 (21%)         | 2 (5%)                             | 11 (23%)           | 1 (2%)                  |                    |                   |  |
|                                                                                |                         | De facto           | 42 (33%)      | 39 (30%)         | 20 (16%)                           | 23 (18%)           | 4 (3%)                  | <sup>2</sup> -2.72 | 0.37 (0.18-0.76)  |  |
|                                                                                |                         | Widowed            | 15 (46%)      | 5 (15%)          | 4 (12%)                            | 8 (24%)            | 1 (3%)                  |                    |                   |  |
|                                                                                |                         |                    |               |                  |                                    |                    |                         |                    |                   |  |
|                                                                                | Residential<br>Location | Urban              | 75 (26%)      | 82 (29%)         | 44 (15%)                           | 67 (23%)           | 20 (7%)                 | <sup>3</sup> -3.08 | 0.25 (0.10-0.61)  |  |
|                                                                                |                         | Suburban           | 105 (27%)     | 118 (30%)        | 63 (16%)                           | 89 (23%)           | 15 (4%)                 |                    |                   |  |
|                                                                                |                         | Rural              | 61 (47%)      | 29 (23%)         | 16 (12%)                           | 22 (17%)           | 1 (1%)                  |                    |                   |  |
|                                                                                | Income                  | Less than \$50,000 | 39 (14%)      | 99 (36%)         | 47 (17%)                           | 53 (19%)           | 39 (14%)                | -1.96              | 0.44 (0.20-1.00)  |  |
|                                                                                |                         | \$50,000-\$100,000 | 73 (30%)      | 74 (30%)         | 32 (13%)                           | 55 (23%)           | 9 (4%)                  |                    |                   |  |
|                                                                                |                         | \$100,000+         | 52 (50%)      | 19 (18%)         | 13 (13%)                           | 18 (18%)           | 1 (1%)                  |                    |                   |  |
|                                                                                |                         | No answer          | 14 (29%)      | 12 (25%)         | 11 (22%)                           | 8 (16%)            | 4 (8%)                  |                    |                   |  |
|                                                                                |                         |                    |               |                  |                                    |                    |                         |                    |                   |  |
| Should action be taken<br>towards controlling feral<br>cats?                   |                         |                    | Yes           |                  | No                                 | Don't Know         |                         |                    |                   |  |
|                                                                                | Age (median)            |                    | 36-45years    |                  | 18-25years                         | 26-35years         |                         | -4.01              | 0.46 (0.32-0.67)  |  |
|                                                                                | Ethnicity               | NZ European        | 461 (89%)     |                  | 29 (6%)                            | 25 (5%)            |                         |                    |                   |  |
| NZ Maori                                                                       |                         | 61 (87%)           |               | 6 (9%)           | 3 (4%)                             |                    |                         |                    |                   |  |
| Asian/Indian                                                                   |                         | 87 (70%)           |               | 28 (23%)         | 9 (7%)                             |                    |                         |                    |                   |  |
| European                                                                       |                         | 162 (86%)          |               | 16 (9%)          | 10 (5%)                            |                    |                         |                    |                   |  |
| Pacific/Cook Is.                                                               |                         | 17 (68%)           |               | 5 (20%)          | 3 (12%)                            |                    |                         |                    |                   |  |
| 2. Pearson Chi<br>-Squared = 0.22                                              | Other                   |                    | 62 (78%)      |                  | 15 (19%)                           | 2 (3%)             |                         | 2.54               | 3.71 (1.35-10.22) |  |
|                                                                                |                         |                    |               |                  |                                    |                    |                         |                    |                   |  |
|                                                                                |                         |                    |               |                  |                                    |                    |                         |                    |                   |  |
| 3. Deviance Chi-squared<br>= 1.00                                              |                         |                    |               |                  |                                    |                    |                         |                    |                   |  |
| Who should be<br>responsible for<br>controlling feral cats?                    | Ethnicity               |                    | Government    | Council          | SPCA                               | Combination        | Other                   |                    |                   |  |
|                                                                                |                         | NZ European        | 97 (21%)      | 114 (25%)        | 25 (6%)                            | 142 (31%)          | 77 (17%)                |                    |                   |  |
|                                                                                |                         | NZ Maori           | 12 (22%)      | 13 (23%)         | 5 (9%)                             | 18 (32%)           | 8 (14%)                 |                    |                   |  |
|                                                                                |                         | Asian/Indian       | 24 (28%)      | 18 (21%)         | 12 (14%)                           | 26 (31%)           | 5 (6%)                  | -2.13              | 0.17 (0.03-1.10)  |  |

|                   |                  |          |          |         |          |          |
|-------------------|------------------|----------|----------|---------|----------|----------|
| Model Diagnostics | European         | 36 (23%) | 39 (24%) | 13 (8%) | 52 (33%) | 20 (18%) |
| 1. Log-Likelihood | Pacific/Cook Is. | 5 (29%)  | 2 (12%)  | 0 (0%)  | 10 (59%) | 0 (0%)   |
| p Value = 0.06    | Other            |          |          |         |          |          |

2. Pearson Chi  
-Squared = 0.36

3. Deviance Chi-squared  
= 1.00

| What action should be taken towards controlling feral cats?                                                                                    |                |                  | Lethal Action | TNR <sup>2</sup> | Non Killing Method <sup>3</sup> | Other <sup>4</sup> | Don't Know+5 |       |                     |
|------------------------------------------------------------------------------------------------------------------------------------------------|----------------|------------------|---------------|------------------|---------------------------------|--------------------|--------------|-------|---------------------|
| Model Diagnostics<br>1. Log-Likelihood<br>p Value = < 0.0001<br><br>2. Pearson Chi<br>-Squared = 0.92<br><br>3. Deviance Chi-squared<br>= 1.00 | Gender         | Male             | 165 (40%)     | 105 (25%)        | 23 (6%)                         | 98 (24%)           | 21 (5%)      | 2.09  | 1.72 (1.04-2.86)    |
|                                                                                                                                                |                | Female           | 159 (37%)     | 117 (28%)        | 31 (7%)                         | 95 (22%)           | 24 (6%)      |       |                     |
|                                                                                                                                                | Age (median)   |                  | 46-55years    | 26-35years       | 26-35years                      | 36-45years         | 26-35years   | -4.92 | 0.57 (0.46-0.72)    |
|                                                                                                                                                | Ethnicity      | NZ European      | 232 (50%)     | 106 (23%)        | 21 (5%)                         | 85 (19%)           | 16 (3%)      | 2.33  | 2.98 (1.19-7.50)    |
|                                                                                                                                                |                | NZ Maori         | 16 (26%)      | 20 (33%)         | 4 (7%)                          | 18 (29%)           | 3 (5%)       |       |                     |
|                                                                                                                                                |                | Asian/Indian     | 11 (13%)      | 23 (26%)         | 6 (7%)                          | 34 (39%)           | 13 (15%)     |       |                     |
|                                                                                                                                                |                | European         | 62 (39%)      | 41 (25%)         | 18 (11%)                        | 32 (20%)           | 8 (5%)       | 3.41  | 4.98 (1.98-12.53)   |
|                                                                                                                                                |                | Pacific/Cook Is. | 2 (12%)       | 3 (17.5%)        | 3 (17.5%)                       | 7 (41%)            | 2 (12%)      | 2.19  | 12.49 (1.30-119.61) |
|                                                                                                                                                |                | Other            | 7 (12%)       | 30 (50%)         | 2 (3%)                          | 18 (30%)           | 3 (5%)       | 3.00  | 27 (1.87-389.09)    |
|                                                                                                                                                | Marital Status | Single           | 88 (24%)      | 122 (34%)        | 31 (9%)                         | 90 (25%)           | 30 (8%)      | -3.01 | 0.16 (0.05-0.53)    |
|                                                                                                                                                |                | Married          | 155 (53%)     | 65 (22%)         | 9 (3%)                          | 57 (19%)           | 8 (3%)       |       |                     |
|                                                                                                                                                |                | Divorced         | 26 (55%)      | 5 (11%)          | 3 (6%)                          | 13 (28%)           | 0 (0%)       |       |                     |
|                                                                                                                                                |                | De facto         | 49 (42%)      | 26 (22.5%)       | 10 (9%)                         | 26 (22.5%)         | 5 (4%)       |       |                     |
|                                                                                                                                                |                | Widowed          | 14 (43%)      | 8 (24%)          | 0 (0%)                          | 9 (27%)            | 2 (6%)       |       |                     |
